# Supplementary material for: Establishment and validation of a non-relapse mortality risk prediction model for high-risk and refractory acute leukemia patients undergoing allogeneic hematopoietic stem cell
Source: Research Square preprint supplement (doi:10.21203/rs.3.rs-6212386/v1), 2025-03-27
Supplement: Supplementary file 1 [file 87a66fe4a71a7d71d4d2b37b.docx]

**
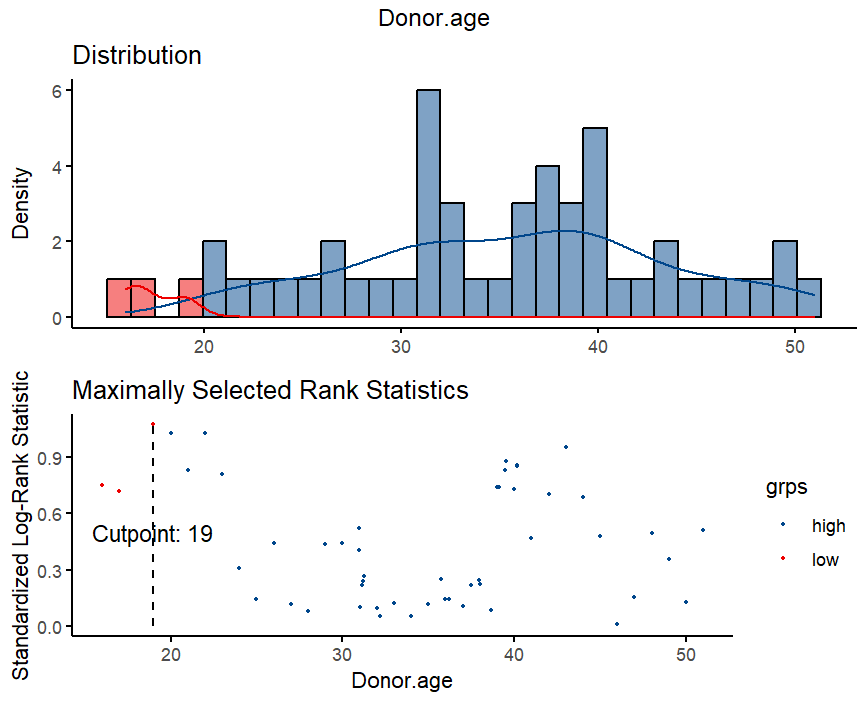

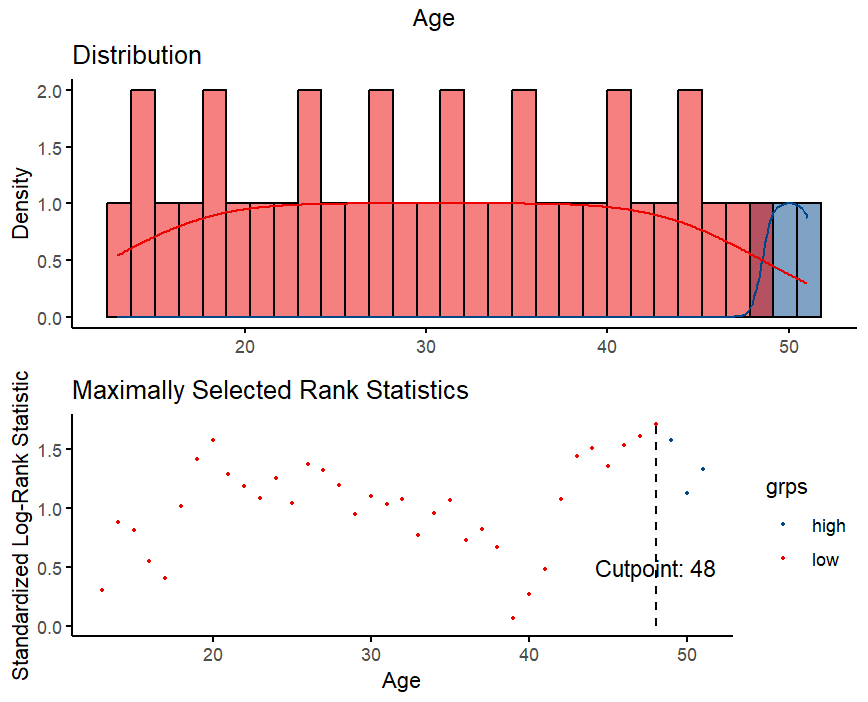

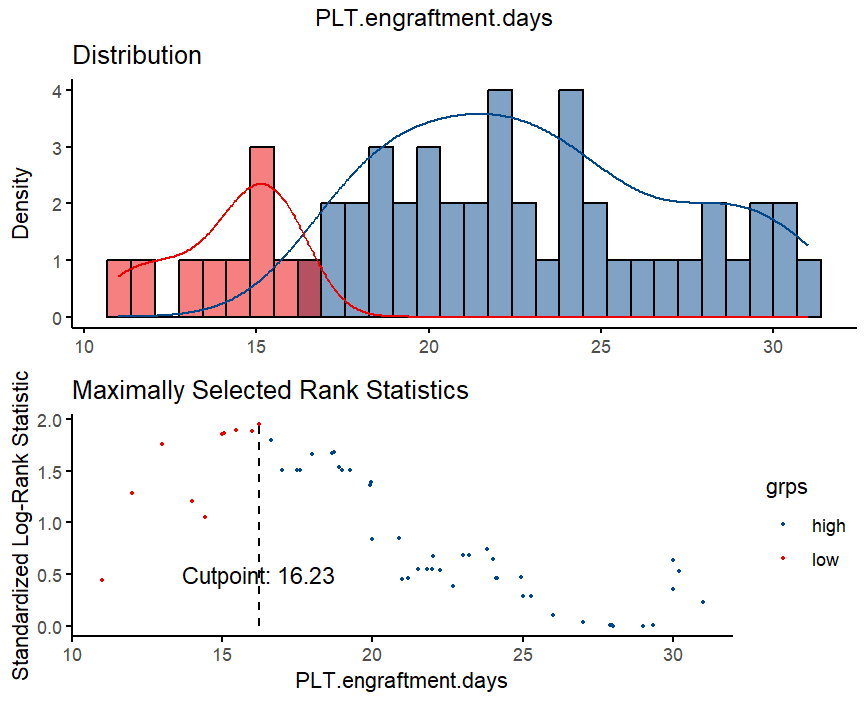

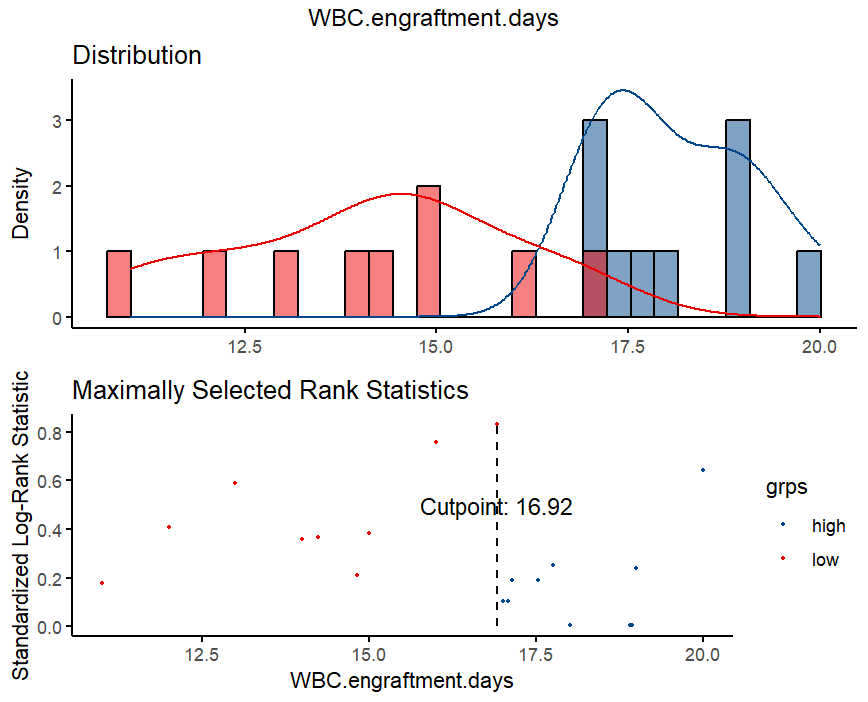
Figure S1. Continuous variable cutoff value visualization**

**D**

**C**

**B**

**A**

A:WBC engraftment days’ cutpoint≈17 B:PLT engraftment days’ cutpoint≈17

C:Age’s cutpoint=48 D:Donor age’s cutpoint=19

WBC: White Blood Cell, PLT: Platelet

**Figure S2. CIF curve of the entire population in the training set
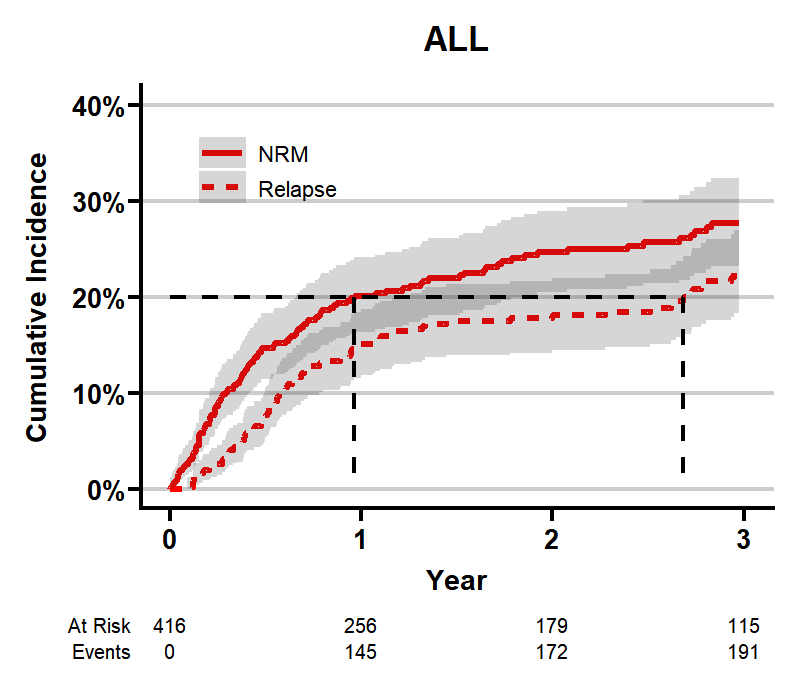
 (Non-relapse mortality (NRM) and Relapse)
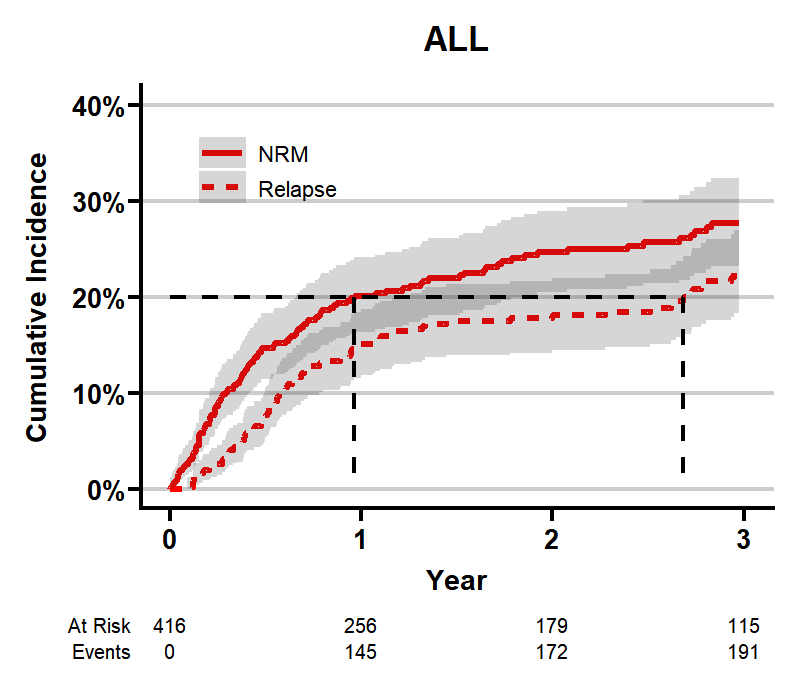
**

**
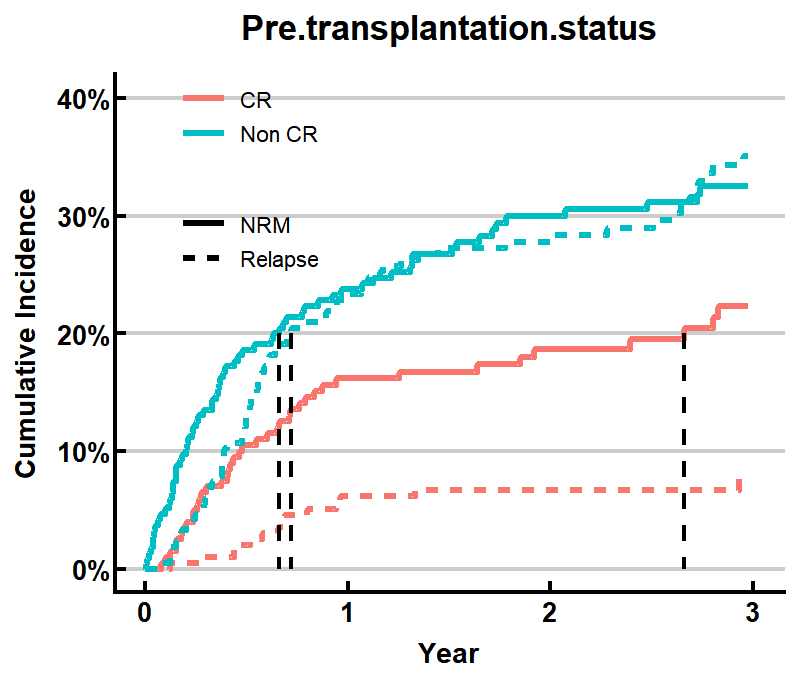

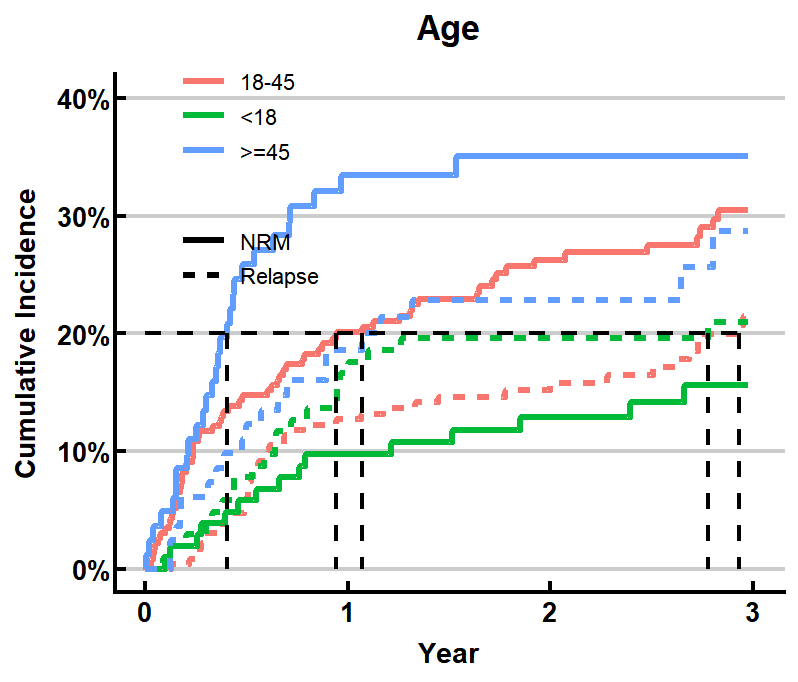
**

**B**

**A**

**
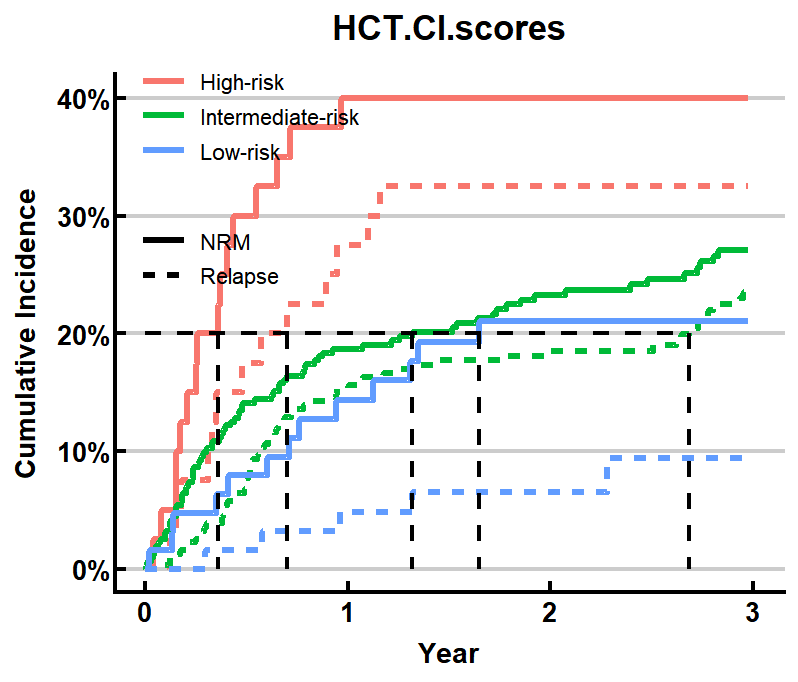

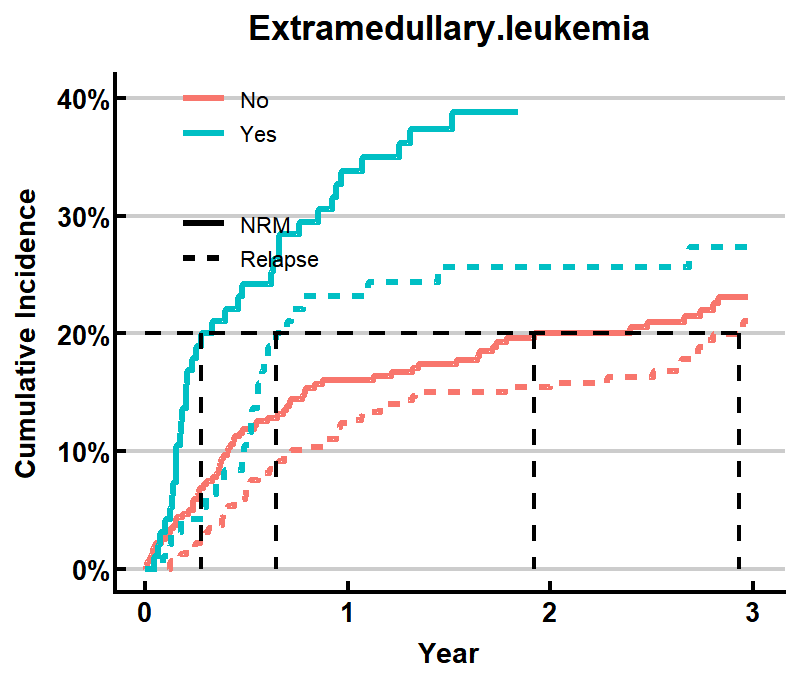
**

**D**

**C**

**
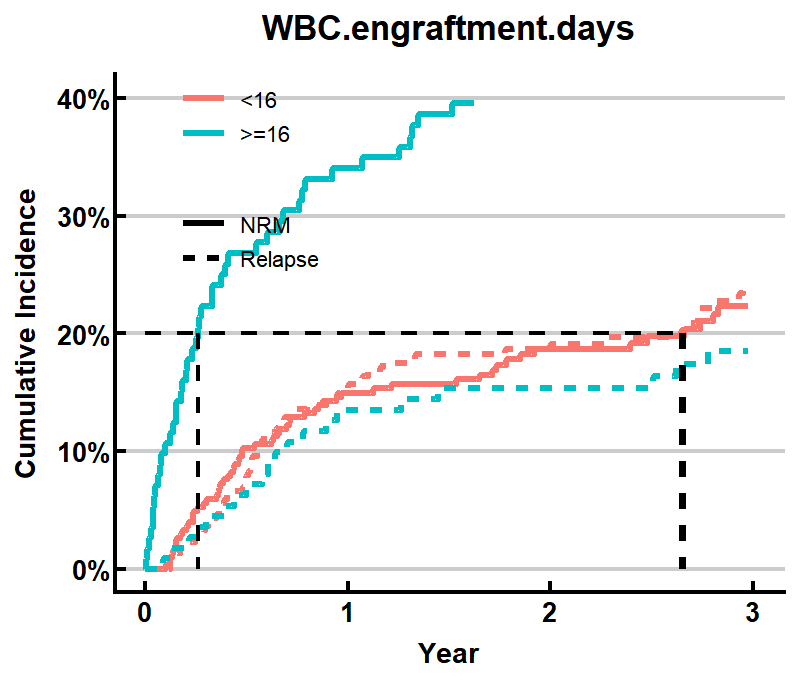

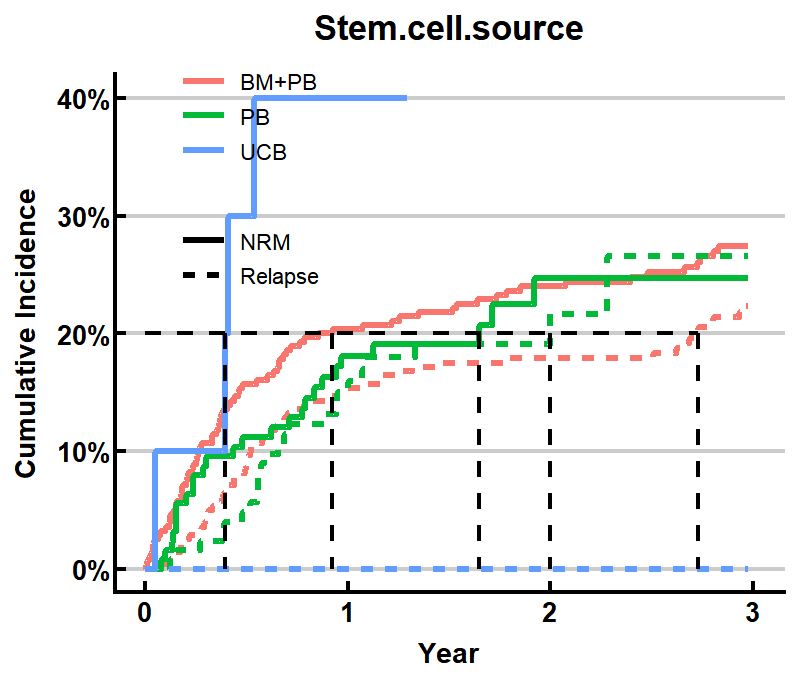

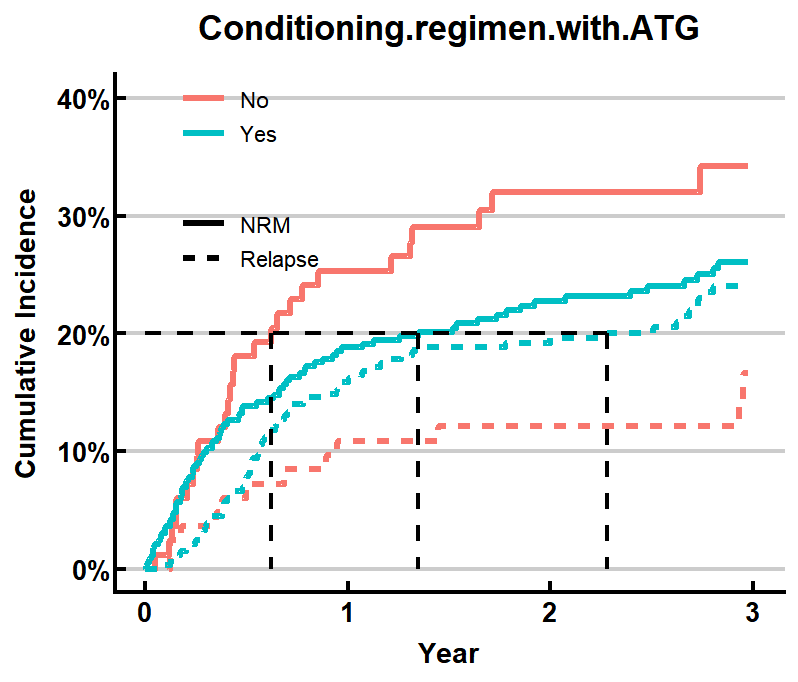

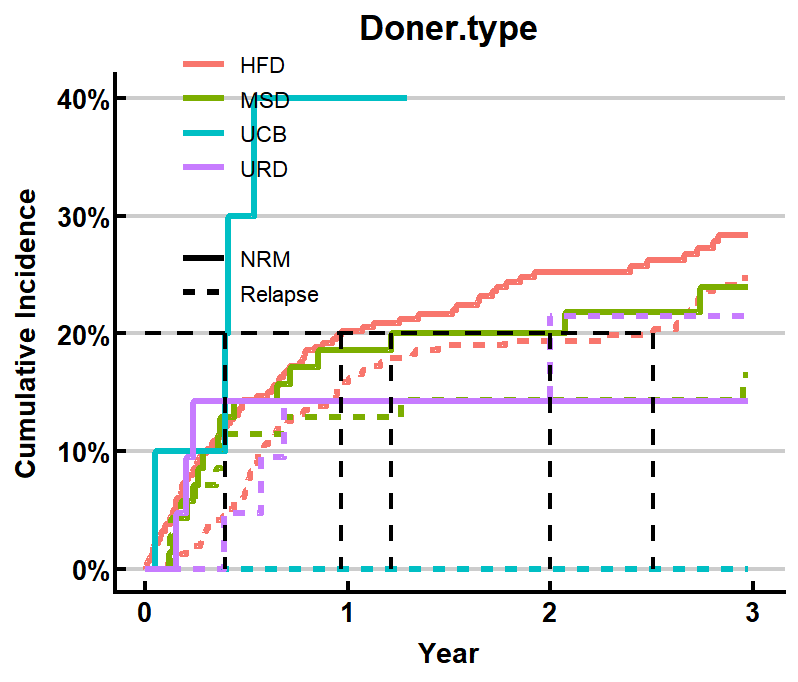
**

**H**

**G**

**F**

**E**

**
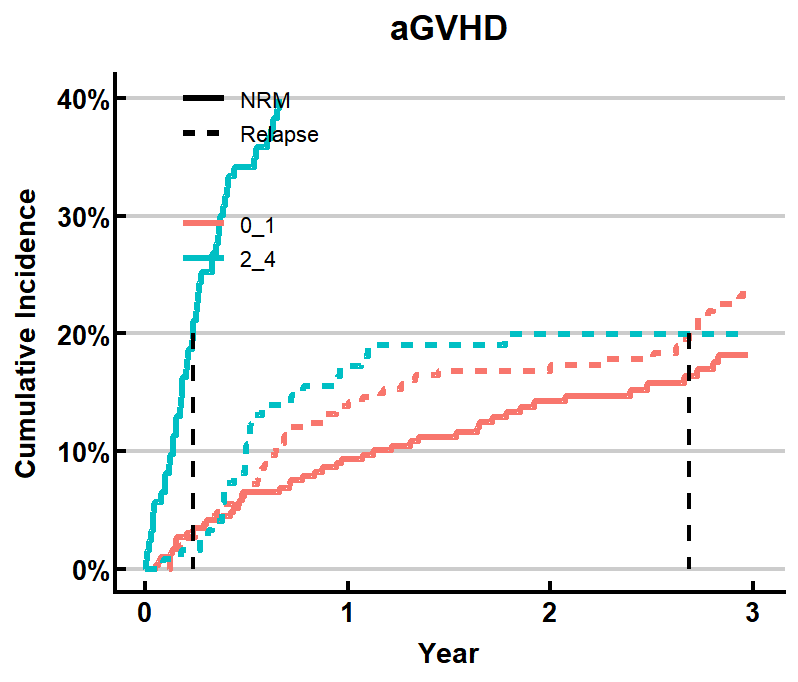

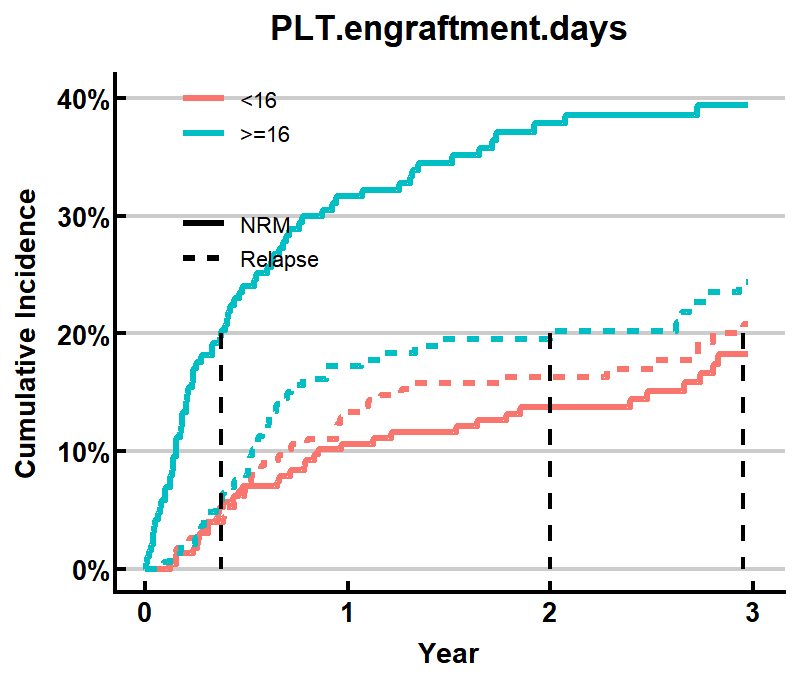
**

**J**

**I**

**Figure S3. Single characteristic CIF curve**

A:Age’s CIF curve B:Pre transplantation status’ CIF curve

C:Extramedullary leukemia’s CIF curve D:HCT-CI scores’ CIF curve

E:Doner type’s CIF curve F:Conditioning regimen with ATG’s CIF curve

G:Stem cell source’s CIF curve H:WBC engraftmen days group’s CIF curve

I:PLT engraftment days group’s CIF curve J:aGVHD’s CIF curve

NRM:Non-relapse mortality, CIF:Cumulative Incidence Function, HCT-CI: Hematopoietic Cell Transplantation-Specific Comorbidity Index, MSD: Matched Sibling Donor, HFD: Haploidentical Family Donor, URD: Unrelated Donor, UCB: Umbilical Cord Blood, ATG: Anti-Thymocyte Globulin, BM: Bone Marrow, PB: Peripheral Blood, WBC: White Blood Cell, PLT: Platelet,GVHD: Graft-versus-Host Disease

**Table S1. Training set and validation set**

| **Characteristic** | **Cohort** | | **p-value2** |
| --- | --- | --- | --- |
| **Training Cohort, N = 4171** | **Internal Test Cohort, N = 1781** |
| **Sex** |  |  | **0.080** |
| Male | 257 (61.6%) | 96 (53.9%) |  |
| Female | 160 (38.4%) | 82 (46.1%) |  |
| **Age_group** |  |  | **0.804** |
| < 18 | 94 (22.5%) | 40 (22.5%) |  |
| 18 - 45 | 239 (57.3%) | 98 (55.1%) |  |
| ≥ 45 | 84 (20.1%) | 40 (22.5%) |  |
| **Underlying.disease** |  |  | **0.919** |
| AML | 311 (74.6%) | 133 (74.7%) |  |
| T-ALL | 35 (8.4%) | 13 (7.3%) |  |
| B-ALL | 57 (13.7%) | 27 (15.2%) |  |
| MAPL | 14 (3.4%) | 5 (2.8%) |  |
| **Pre.transplantation.status** |  |  | **0.295** |
| CR | 214 (51.3%) | 83 (46.6%) |  |
| Non CR | 203 (48.7%) | 95 (53.4%) |  |
| **CNSL** |  |  | **0.340** |
| No | 379 (90.9%) | 166 (93.3%) |  |
| Yes | 38 (9.1%) | 12 (6.7%) |  |
| **Extramedullary.leukemia** |  |  | **0.964** |
| No | 324 (77.7%) | 138 (77.5%) |  |
| Yes | 93 (22.3%) | 40 (22.5%) |  |
| **HCT.CI.scores** |  |  | **0.566** |
| Low-risk | 70 (16.8%) | 24 (13.5%) |  |
| Intermediate-risk | 310 (74.3%) | 136 (76.4%) |  |
| High-risk | 37 (8.9%) | 18 (10.1%) |  |
| **Donor.recipient.sex.matched** |  |  | **0.337** |
| Male-male | 203 (48.7%) | 75 (42.1%) |  |
| Male-female | 116 (27.8%) | 62 (34.8%) |  |
| Female-male | 54 (12.9%) | 21 (11.8%) |  |
| Female-female | 44 (10.6%) | 20 (11.2%) |  |
| **Donor.age_group** |  |  | **0.012** |
| < 18 | 51 (12.2%) | 16 (9.0%) |  |
| 18 - 45 | 265 (63.5%) | 98 (55.1%) |  |
| ≥ 45 | 101 (24.2%) | 64 (36.0%) |  |
| **Doner.type** |  |  | **0.133** |
| MSD | 71 (17.0%) | 28 (15.7%) |  |
| HFD | 309 (74.1%) | 142 (79.8%) |  |
| UCB | 15 (3.6%) | 1 (0.6%) |  |
| URD | 22 (5.3%) | 7 (3.9%) |  |
| **Donor.recipient.blood.type.matched** |  |  | **0.758** |
| Matched | 230 (55.2%) | 93 (52.2%) |  |
| Major dismatched | 89 (21.3%) | 37 (20.8%) |  |
| Minor dismatched | 69 (16.5%) | 36 (20.2%) |  |
| Bidirectional | 29 (7.0%) | 12 (6.7%) |  |
| **TCI** |  |  | **0.257** |
| Median (IQR) | 2.00 (1.50, 2.00) | 2.00 (2.00, 2.50) |  |
| **Conditioning.regimen.with.ATG** |  |  | **0.401** |
| No | 90 (21.6%) | 33 (18.5%) |  |
| Yes | 327 (78.4%) | 145 (81.5%) |  |
| **Stem.cell.source** |  |  | **0.040** |
| BM+PB | 271 (65.0%) | 129 (72.5%) |  |
| PB | 131 (31.4%) | 48 (27.0%) |  |
| UCB | 15 (3.6%) | 1 (0.6%) |  |
| **With.UCB** |  |  | **0.101** |
| No | 136 (32.6%) | 46 (25.8%) |  |
| Yes | 281 (67.4%) | 132 (74.2%) |  |
| **MNC.cell.dose.count_group** |  |  | **0.865** |
| < 10 | 356 (85.4%) | 151 (84.8%) |  |
| ≥ 10 | 61 (14.6%) | 27 (15.2%) |  |
| **CD34..cell.dose.count_group** |  |  | **0.187** |
| < 2 | 64 (15.3%) | 20 (11.2%) |  |
| ≥ 2 | 353 (84.7%) | 158 (88.8%) |  |
| **WBC.engraftment.days_group** |  |  | **0.365** |
| < 16 | 277 (66.4%) | 125 (70.2%) |  |
| ≥ 16 | 140 (33.6%) | 53 (29.8%) |  |
| **PLT.engraftment.days_group** |  |  | **0.591** |
| < 16 | 229 (54.9%) | 102 (57.3%) |  |
| ≥ 16 | 188 (45.1%) | 76 (42.7%) |  |
| **CMV.infections** |  |  | **0.231** |
| No | 49 (11.8%) | 15 (8.4%) |  |
| Yes | 368 (88.2%) | 163 (91.6%) |  |
| **EBV.infections** |  |  | **0.066** |
| No | 281 (67.4%) | 106 (59.6%) |  |
| Yes | 136 (32.6%) | 72 (40.4%) |  |
| **Hemorrhagic.cystitis** |  |  | **0.185** |
| No | 85 (20.4%) | 28 (15.7%) |  |
| Yes | 332 (79.6%) | 150 (84.3%) |  |
| **aGVHD** |  |  | **0.914** |
| 0_1 | 297 (71.2%) | 126 (70.8%) |  |
| 2_4 | 120 (28.8%) | 52 (29.2%) |  |
| **cGVHD** |  |  | **0.692** |
| No | 27 (6.5%) | 10 (5.6%) |  |
| Yes | 390 (93.5%) | 168 (94.4%) |  |
| 1n (%) | | | |
| 2Pearson's Chi-squared test; Fisher's exact test; Wilcoxon rank sum test | | | |

AML: Acute Myeloid Leukemia, ALL: Acute Lymphoblastic Leukemia, MAPL: Mixed Phenotype Acute Leukemia, CNSL: Central Nervous System Leukemia, HCT-CI: Hematopoietic Cell Transplantation-Specific Comorbidity Index, MSD: Matched Sibling Donor, HFD: Haploidentical Family Donor, URD: Unrelated Donor, UCB: Umbilical Cord Blood, ATG: Anti-Thymocyte Globulin, TCI: Transplant Conditioning Intensity, BM: Bone Marrow, PB: Peripheral Blood, MNC: Mononuclear Cells, WBC: White Blood Cell, PLT: Platelet, CMV: Cytomegalovirus, EBV: Epstein-Barr Virus, GVHD: Graft-versus-Host Disease

**Table S2. Cumulative incidence of NRM and Relapse in the entire population**

|  | **1-year cumulative incidence rate** | **2-year cumulative incidence rate** | **3-year cumulative incidence rate** |
| --- | --- | --- | --- |
| **NRM** | 20% (16%, 24%) | 25% (20%, 29%) | 28% (23%, 32%) |
| **Relapse** | 15% (12%, 19%) | 18% (14%, 22%) | 22% (18%, 27%) |

**Table S3. Fine-Gray test’s p value**

|  | **NRM** | **Relapse** |
| --- | --- | --- |
| **Age** | <0.001 | 0.41 |
| **Pre.transplantation.status** | 0.006 | <0.001 |
| **Extramedullary.leukemia** | <0.001 | 0.17 |
| **HCT.CI.scores** | 0.022 | <0.001 |
| **Doner.type** | 0.10 | 0.14 |
| **Conditioning.regimen.with.ATG** | 0.055 | 0.066 |
| **Stem.cell.source** | 0.061 | 0.21 |
| **WBC.engraftment.days** | <0.001 | 0.12 |
| **PLT.engraftment.days** | <0.001 | 0.61 |
| **aGVHD** | <0.001 | 0.96 |

HCT-CI: Hematopoietic Cell Transplantation-Specific Comorbidity Index, WBC: White Blood Cell, PLT: Platelet, GVHD: Graft-versus-Host Disease
